# Supplementary material for: Impact of free valence electron contraction on the optical and electrocatalytic properties of nanoclusters: based on M1Ag14 (M = Pt/Pd) series nanoclusters
Source: Royal Society of Chemistry journal article supplement (doi:10.1039/d5nr00336a), 2025-01-01
Supplement: d5nr00336a1.pdf [file d5nr00336a1.pdf]

## Supporting Information

### **Impact of Free Valence Electrons Contraction on Nanoclusters Optical and Electrocatalytic Properties: based on $M_1Ag_{14}$ ( $M = Pt/Pd$ ) Series Nanoclusters**

**Tingting Liu,<sup>b</sup> Yuansheng Li,<sup>b</sup> Yang Zuo,<sup>b</sup> Along Ma,<sup>a</sup> Yifei Wang,<sup>b</sup> Shuo**

**Zhang,<sup>b</sup> Xiaoshuang Ma,<sup>b</sup> Zhengmao Yin,<sup>\*b</sup> Junxian Yang<sup>\*b</sup> and Shuxin**

**Wang<sup>\*a</sup>**

Along Ma, Shuxin Wang\*

College of Chemistry and Molecular Engineering, Qingdao University of Science and Technology, Qingdao 266042, China.

email: [shuxin\\_wang@qust.edu.cn](mailto:shuxin_wang@qust.edu.cn)

Tingting Liu, Yuansheng Li, Yang Zuo, Shuo Zhang, Yifei Wang, Shuo Zhang, Xiaoshuang Ma, Zhengmao Yin\*, Junxian Yang\*

College of Materials Science and Engineering, Qingdao University of Science and Technology, Qingdao 266042, China.

email: [yzm198752@163.com](mailto:yzm198752@163.com), [yangjx@qust.edu.cn](mailto:yangjx@qust.edu.cn)

## Table of Contents

### Section 1. Characterization, Electrochemical measurements and DFT calculations

- I. Characterization
- II. Electrochemical measurements
- III. DFT calculations

### Section 2. Supporting Figures

- Scheme S1.** Photographs of the synthesis process of the  $\text{Pt}_1\text{Ag}_{14}$  nanocluster.
- Fig. S1** The overall structure of the  $\text{Pd}_1\text{Ag}_{14}$  and  $\text{Pt}_1\text{Ag}_{14}$  nanoclusters.
- Fig. S2** SEM image and corresponding elemental mapping images of the  $\text{Pt}_1\text{Ag}_{14}$  nanocluster.
- Fig. S3** XPS spectra of the  $\text{Pt}_1\text{Ag}_{14}$  nanocluster. (a) Pt 4f; (b) Ag 3d.
- Fig. S4** Structural comparison and bond length among  $\text{Pt}_1\text{Ag}_{14}$  and  $\text{Pd}_1\text{Ag}_{14}$  nanoclusters.
- Fig. S5** A unit cell in the  $\text{Pt}_1\text{Ag}_{14}$  single crystal.
- Fig. S6** Packing mode of  $\text{Pt}_1\text{Ag}_{14}$  in the crystal shown.
- Fig. S7** Packing mode of  $\text{Pd}_1\text{Ag}_{14}$  in the crystal shown.
- Fig. S8** Characterization of  $\text{Pd}_1\text{Ag}_{14}$  nanocluster.
- Fig. S9** (a)  $\text{H}_2$  faradaic efficiency of the  $\text{Pd}_1\text{Ag}_{14}/\text{C}$  (black) and  $\text{Pt}_1\text{Ag}_{14}/\text{C}$  (red) at different potentials. (b)  $\text{H}_2$  partial current density of the  $\text{Pd}_1\text{Ag}_{14}/\text{C}$  (black) and  $\text{Pt}_1\text{Ag}_{14}/\text{C}$  (red) at different potentials.
- Fig. S10** Gas products ( $\text{CO}$ ) analysis for  $\text{eCO}_2\text{RR}$  on  $\text{Pd}_1\text{Ag}_{14}/\text{C}$  and  $\text{Pt}_1\text{Ag}_{14}/\text{C}$ . Gas chromatography shows the gas products of  $\text{eCO}_2\text{RR}$  at  $-1.3 \text{ V}_{\text{RHE}}$
- Fig. S11** The  $^1\text{H}$  NMR spectra of the catholyte reaction solution for the  $\text{Pd}_1\text{Ag}_{14}/\text{C}$ .
- Fig. S12** The  $^1\text{H}$  NMR spectra of the catholyte reaction solution for the  $\text{Pt}_1\text{Ag}_{14}/\text{C}$ .
- Fig. S13** Tafel plots constructed for the  $\text{eCO}_2\text{RR}$  on the two catalysts.
- Fig. S14** UV-vis absorbance spectra of the three nanoclusters before and after  $\text{eCO}_2\text{RR}$ . (a)  $\text{Pd}_1\text{Ag}_{14}$  and (b)  $\text{Pt}_1\text{Ag}_{14}$ .
- Fig. S15** The Electrochemical Impedance Spectroscopy of  $\text{Pd}_1\text{Ag}_{14}/\text{C}$  and  $\text{Pt}_1\text{Ag}_{14}/\text{C}$ .
- Fig. S16** CV curves at various scan rates (from 20 to  $100 \text{ mV s}^{-1}$ ) of (a)  $\text{Pd}_1\text{Ag}_{14}/\text{C}$  and (b)  $\text{Pt}_1\text{Ag}_{14}/\text{C}$
- Fig. S17** The comparison of electrochemical double layer capacitance over  $\text{Pd}_1\text{Ag}_{14}/\text{C}$  (red line) and  $\text{Pt}_1\text{Ag}_{14}/\text{C}$  (black line).
- Fig. S18** The turnover frequency of  $\text{C}_1$  products was obtained from  $\text{Pd}_1\text{Ag}_{14}/\text{C}$  and  $\text{Pt}_1\text{Ag}_{14}/\text{C}$ .

### Section 3. Supporting Table

- Table S1.** The crystal structure parameters for  $\text{Pt}_1\text{Ag}_{14}(\text{PhS})_6((p\text{-OMePh})_3\text{P})_7$  ( $\text{Pt}_1\text{Ag}_{14}$ ).
- Table S2.** The data of Bader charge analysis for the  $\text{Pd}_1\text{Ag}_{14}$  nanocluster.
- Table S3.** The data of Bader charge analysis for the  $\text{Pt}_1\text{Ag}_{14}$  nanocluster.

## Section 1. Characterization, Electrochemical measurements, and DTF calculations

### I. Characterization

**Ultraviolet-visible spectroscopy (UV-Vis):** The UV-Vis spectra were acquired using a Shanghai Metash UV-8000 spectrophotometer. All the samples were dissolved in  $\text{CH}_2\text{Cl}_2$  for the spectral measurements.

**X-ray photoelectron spectroscopy (XPS):** The XPS measurements were carried out using an ESCALAB XI+ system equipped with a monochromated  $\text{AlK}\alpha$  (1486.8 eV) 150W X-ray source, a 0.5 mm circular spot, and a flood gun to mitigate charging effects. The base pressure in the analysis chamber was maintained below  $1 \times 10^{-9}$  mbar, and data were collected with a pass energy of 20 eV. The crystal particles of  $\text{Pd}_1\text{Ag}_{14}$  and  $\text{Pt}_1\text{Ag}_{14}$  were adhered to packaging tape for testing, with a small amount of carbon added for data correction.

**Scanning electron microscope-energy dispersive spectrometer (SEM-EDS):** SEM-EDS analysis was performed using a JSM-6700F instrument. The crystal particles of  $\text{Pd}_1\text{Ag}_{14}$  and  $\text{Pt}_1\text{Ag}_{14}$  were mounted on conductive adhesive, and the measurements were taken with an accelerating voltage ranging from 0.1 to 30 kV.

**Thermogravimetric analysis (TGA):** TGA was performed using a thermogravimetric analyzer (DTG-60H) with approximately 8 mg of nanoclusters placed in a  $\text{SiO}_2$  pan. The analysis was conducted at a heating rate of 20 K/min under a nitrogen atmosphere. Prior to TGA testing, the sample was extracted for 5 hours with a vacuum pump to eliminate solvent molecules.

**Nuclear magnetic resonance (NMR):** NMR measurements were performed using a Bruker Avance spectrometer operating at 400 MHz for  $^1\text{H}$ . For the preparation sample, electrolysis was performed at each potential from -0.9 V (vs. RHE) to -1.7 V (vs. RHE) for 8 minutes. After 400  $\mu\text{L}$  of the cathode reaction solution and 200  $\mu\text{L}$  of  $\text{D}_2\text{O}$  (using DMSO as an internal standard) were mixed,  $^1\text{H}$  NMR tests were performed directly.

#### X-ray crystallography:

The data collections for single crystal X-ray diffraction (SC-XRD) were carried out on a Bruker D8 Quest at 170 K, using  $\text{Mo-K}\alpha$  radiation ( $\lambda = 0.71073 \text{ \AA}$ ). The structure was solved by intrinsic phasing and refined with full-matrix least squares on  $F^2$  using the SHELXTL software package. All non-hydrogen atoms were refined anisotropically, and all the hydrogen atoms were set in geometrically calculated positions and refined isotopically using a riding model. Detailed crystal data for  $\text{Pt}_1\text{Ag}_{14}$  nanocluster is given in Table S1. The CCDC number for  $\text{Pt}_1\text{Ag}_{14}$  is 2413566, which includes the supplementary crystallographic data associated with this study. These data are provided free of charge by the Cambridge Crystallographic Data Centre.

### II. Electrochemical measurements

To prepare the catalyst sample, the as-prepared two  $\text{M}_1\text{Ag}_{14}$  nanoclusters were loaded on Multi-walled Ketjen Carbon (C) with a mass ratio of 1 (5 mg nanoclusters and 5 mg Ketjen Carbon). The catalyst ink was prepared by dispersing the sample in isopropanol ( $2.5 \text{ mg}\cdot\text{mL}^{-1}$ ) under sonication for 20 minutes. Then, 1 mL catalyst suspension and 10  $\mu\text{L}$  Nafion (5 wt.%) were uniformly mixed

as the final catalyst ink. Subsequently, 40  $\mu\text{L}$  catalytic ink was dropwise cast onto the carbon cloth ( $1 \times 1 \text{ cm}^2$ ) and dried at room temperature as the working electrode. 0.5 M  $\text{KHCO}_3$  solution (pH = 7.2 when saturated with  $\text{CO}_2$ ) was used as the electrolyte.

The electrochemical properties of two catalysts were evaluated on a DONGHUA DH7001B electrochemical workstation. All electrochemical measurements were carried out in a custom gas-tight H-cell with two compartments separated by Nafion 117 membrane. Each compartment contained 25 mL electrolyte (0.5 M  $\text{KHCO}_3$ ) with approximately 10 mL headspace. Ag/AgCl in 0.5 M  $\text{KHCO}_3$  saturated aqueous electrolyte was employed as the reference electrode. Electrode potentials measured on the Ag/AgCl scale ( $E_{\text{Ag/AgCl}}$ ) were converted into the reversible hydrogen electrode (RHE) scale using the following equation:

$$E(\text{RHE}) = E(\text{Ag/AgCl}) + 0.1976 + 0.0592 \times \text{pH}$$

The output of the gas flow from the cathode chamber passes through a gas flow controller (the gas flow controller was used to control the gas flow rate) and then into a gas chromatograph instrument (GC3900Plus, RUI NENG) for on-line identification and quantification of the gaseous products, which was purged for 30 min with an average rate of  $10 \text{ mL} \cdot \text{min}^{-1}$  (at room temperature and ambient pressure) prior to the test.

The faradaic efficiency ( $FE_X$ ) and partial current density ( $j_X$ ) of X (X= CO or  $\text{H}_2$ ) were calculated as below:

$$FE_X = \frac{(N_i \times n \times F)}{Q_t}$$

$$j_X = \frac{FE_X \times Q_t}{t \times \text{Area}}$$

Where

$Q_t$  = total charge consumed in the electrochemical reaction

$N_i$  = the number of moles of the product (measured GC)

$n$  = the number of electrons transferred in the elementary reaction ( $n$  is 2 for CO and  $\text{H}_2$ )

$F$  = the Faradaic constant ( $96485 \text{ C mol}^{-1}$ )

$t$  = reaction time (s)

Area = geometry area of the electrode ( $1 \text{ cm}^2$ )

An Ag/AgCl electrode containing  $3.4 \text{ mol} \cdot \text{L}^{-1}$  KCl was used as the reference electrode, a  $1 \times 1 \text{ cm}^2$  platinum plate served as the counter electrode, and a catalyst-coated carbon cloth was employed as the working electrode. The ECSA was determined in a 0.5 M  $\text{KHCO}_3$  electrolyte using cyclic voltammetry (CV) curves recorded over a potential range of 0.2 to 0.3 V (vs. RHE) at scan rates ranging from 20 to  $100 \text{ mV} \cdot \text{s}^{-1}$ . All CV curves were obtained during  $\text{CO}_2$  electroreduction without IR compensation. The current density showed a linear relationship with the scan rate, and its proportionality constant corresponds to the double-layer capacitance ( $C_{\text{dl}}$ ). The ECSA was calculated using the following formula:

$$\text{ECSA} = \frac{C_{\text{dl}}}{C_s}$$

$C_{\text{dl}}$  = the measured electric double-layer capacitance

$C_s$  = the specific capacitance of the electrode material.

After the eCO<sub>2</sub>RR tests were completed, the samples were rinsed with CH<sub>2</sub>Cl<sub>2</sub> and collected for UV-vis characterization.

At each potential, 400  $\mu$ L of the electrolyzed catholyte was collected, and 200  $\mu$ L of D<sub>2</sub>O containing DMSO as an internal standard was added. The product peak area was calculated using MestReNova, and the Faraday efficiency ( $FE_{\text{formate}}$ ) of the liquid product was calculated using the following formula:

$$n_{\text{formate}} = \frac{n_{\text{DMSO}} \times n_1 \times S_1}{n_2 \times S_2}$$
$$FE_{\text{formate}} = \frac{n_{\text{foemate}} \times F \times n}{Q_t \times n_3} \times 100\%$$

Where

$n_{\text{DmsO}}$  = The amount of the substance of the internal standard DMSO (0.00063mmol).

$n$  = the number of electrons transferred in the elementary reaction ( $n$  is 2 for formate).

$n_1$  = Amount of methyl (-CH<sub>3</sub>) hydrogen on dimethyl sulfoxide ( $n_1 = 6$ ).

$n_2$  = The amount of carboxyl (-COOH) hydrogen on formate ( $n_2 = 1$ ).

$n_3$  = The ratio of cathode reaction solution to total catholyte taken when configuring <sup>1</sup>H NMR ( $n_3 = 0.016$ ).

$S_1$  = MestReNova calculates the HCOOH peak area based on the DMSO peak area.

$S_2$  = The DMSO peak area in MestReNova is set to 1.

$F$  = the Faradaic constant (96485 C mol<sup>-1</sup>).

$Q_t$  = total charge consumed in the electrochemical reaction.

### III. DFT calculations

Periodic DFT calculations were performed with the VASP code using the Perdew-Burke-Ernzerhof exchange-correlation function of the generalized gradient approximation (GGA). Projector augmented wave (PAW) pseudopotential was used to describe core-valence interactions, with [Pt]-6s<sup>1</sup>5d<sup>9</sup>, [Pd]-4d<sup>10</sup> and [Ag]-5s<sup>1</sup>4d<sup>10</sup> as valence electrons. The plane-wave cutoff energy was set to 400 eV. The Brillouin zone of the reciprocal space was sampled with the  $\Gamma$ -centred Monkhorst-Pack scheme, the k-point mesh was set to  $1 \times 1 \times 1$  for the geometry optimization. The energy convergence of the self-consistent iteration reached 10<sup>-5</sup> eV per atom and the Hellmann-Feynman forces convergence was 0.03 eV  $\text{\AA}^{-1}$ , ensuring that the structure optimization process converged to a stable structure.

## Section 2. Supporting Figures

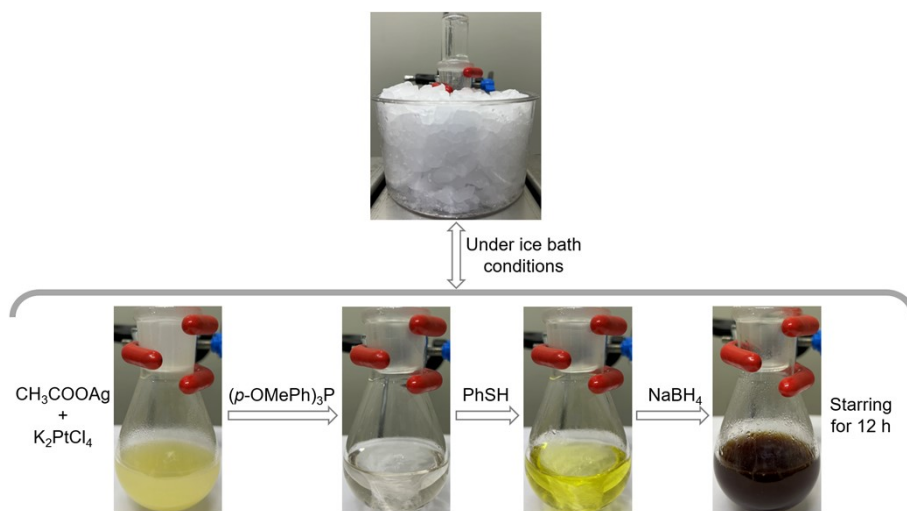

**Scheme S1.** Photographs of the synthesis process of the **Pt<sub>1</sub>Ag<sub>14</sub>** nanocluster. The entire reaction was carried out under ice bath conditions; however, to capture clear images of the reaction, the reaction mixtures were temporarily removed from the ice bath during photography.

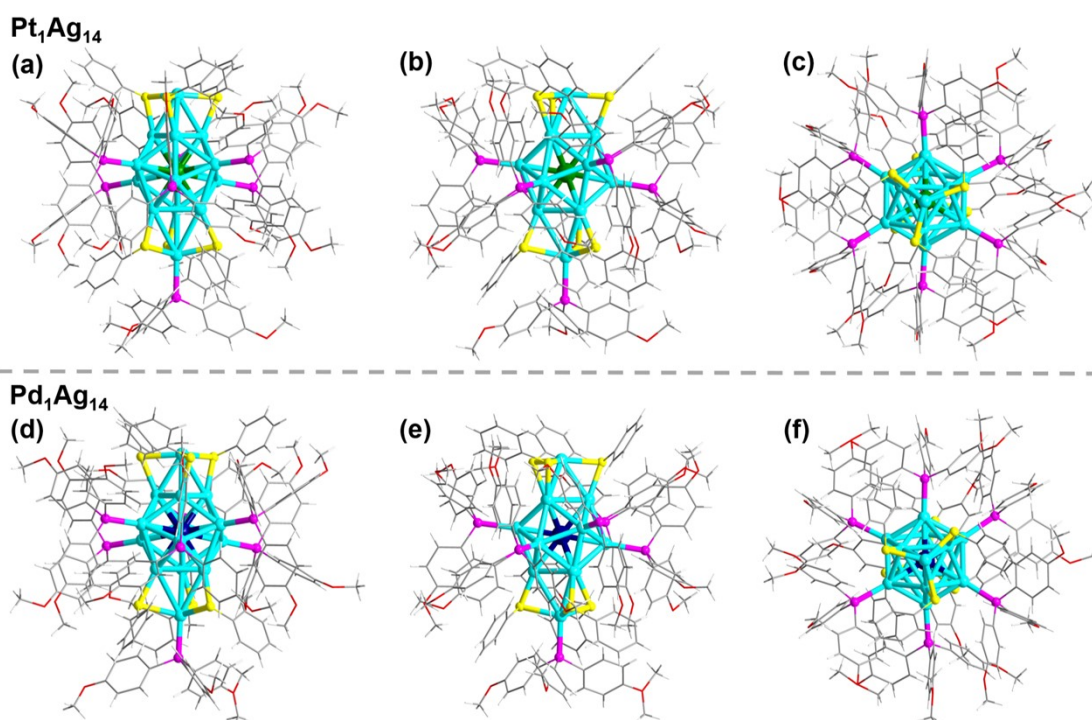

**Fig. S1** The overall structure of the **Pt<sub>1</sub>Ag<sub>14</sub>** and **Pd<sub>1</sub>Ag<sub>14</sub>** nanoclusters. The (a) front view, (b) top view, and (c) top view of the **Pt<sub>1</sub>Ag<sub>14</sub>** nanocluster; The (d) front view, (e) side view, and (f) top view of the **Pd<sub>1</sub>Ag<sub>14</sub>** nanocluster. Color labels: green = Pt; dark blue = Pd; light blue = Ag; yellow = S; magenta = P; red = O; grey = C; white = H.

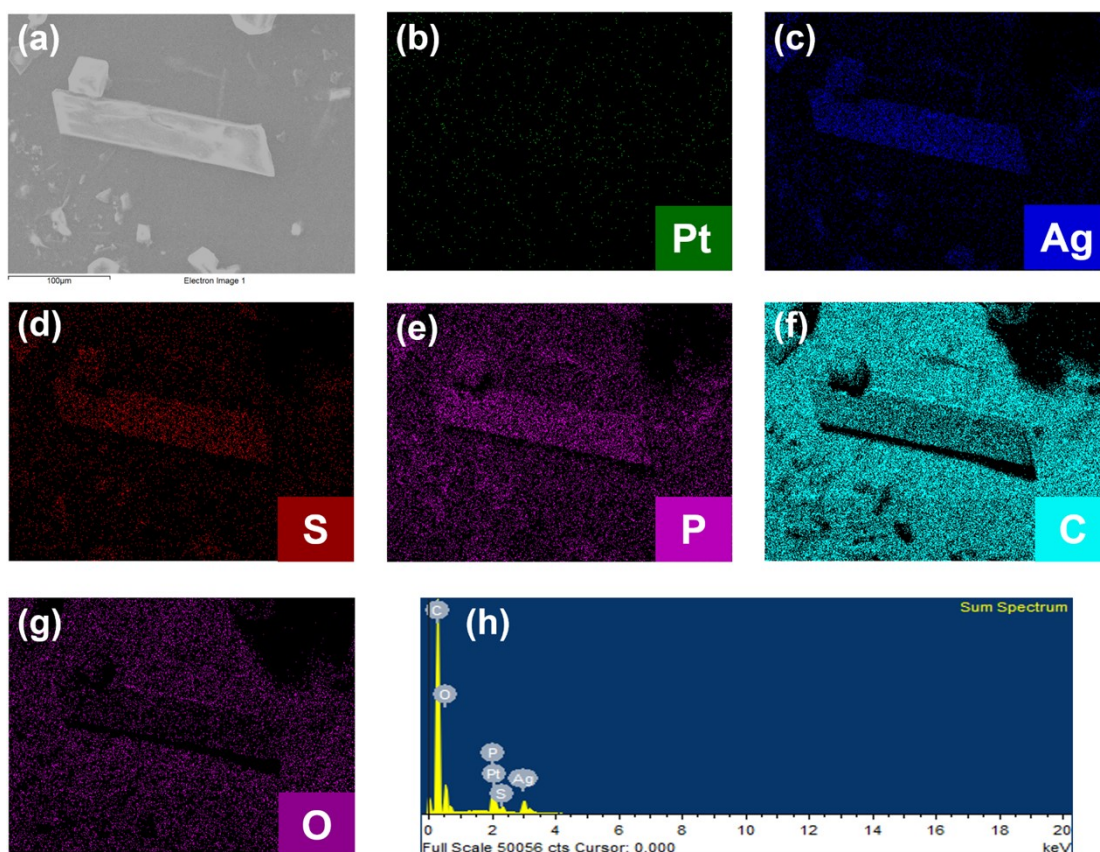

**Fig. S2** SEM image and corresponding elemental mapping images of the  $\text{Pt}_1\text{Ag}_{14}$  nanocluster. (a) SEM image of single crystal; (b)-(g) elemental mapping images of Pt, Ag, S, P, C and O elements, respectively; (h) EDS spectrum confirming the presence of above elements (Pt, Ag, S, P, C and O) in  $\text{Pt}_1\text{Ag}_{14}$  nanocluster, which is consistent with the cluster composition obtained by SC-XRD.

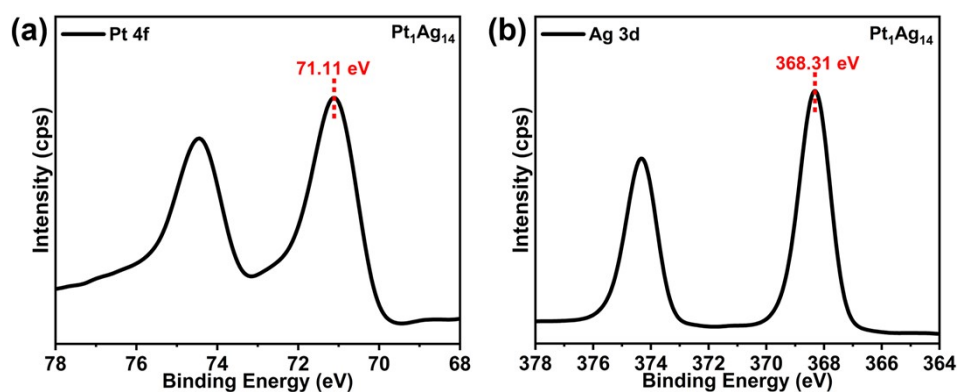

**Fig. S3** XPS spectra of the  $\text{Pt}_1\text{Ag}_{14}$  nanocluster. (a) Pt 4f; (b) Ag 3d.



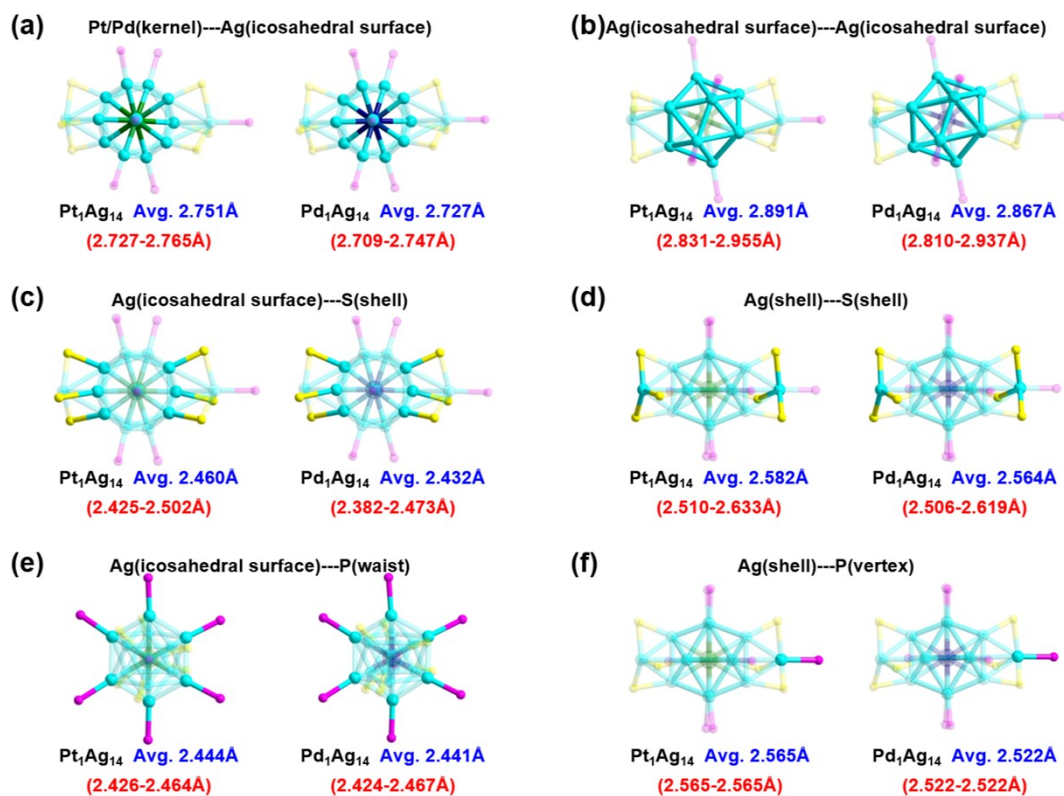

**Fig. S4** Structural comparison and bond length among **Pt<sub>1</sub>Ag<sub>14</sub>** and **Pd<sub>1</sub>Ag<sub>14</sub>** nanoclusters. (a) Comparison of the bond length of Pt/Pd(kernel)---Ag(icosahedral surface); (b) comparison of the bond length of Ag(icosahedral surface)---Ag(icosahedral surface); (c) comparison of the bond length of Ag(icosahedral surface)---S(shell); (d) comparison of the bond length of Ag(shell)---S(shell); (e) comparison of the bond length of Ag(icosahedral surface)---P(waist); (f) comparison of the bond length of Ag(shell)---P(vertex). The compared bonds are highlighted in solid. Color labels: green = Pt; dark blue = Pd; light blue = Ag; yellow = S; magenta = P.

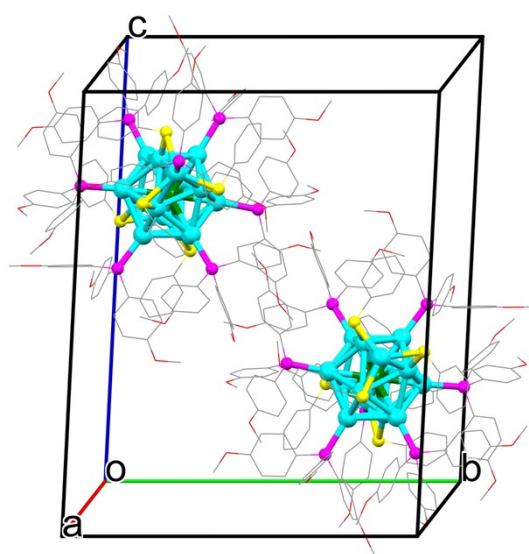

**Fig. S5** A unit cell in the **Pt<sub>1</sub>Ag<sub>14</sub>** single crystal. Color labels: green = Pt; light blue = Ag; yellow = S; magenta = P; red = O; grey = C. All H atoms are omitted for clarity.



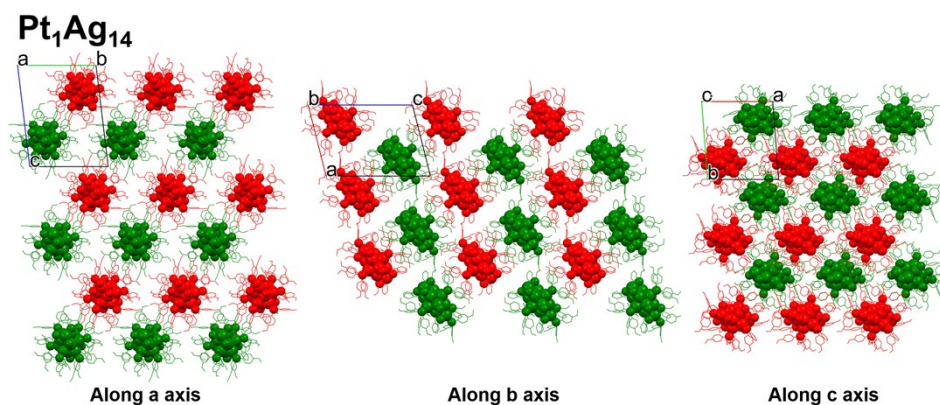

**Fig. S6** Packing mode of **Pt<sub>1</sub>Ag<sub>14</sub>** in the crystal shown. (a) Along a axis; (b) along b axis; (c) along c axis. All H atoms are omitted for clarity. The cluster molecules arranged in different directions show in different colors.

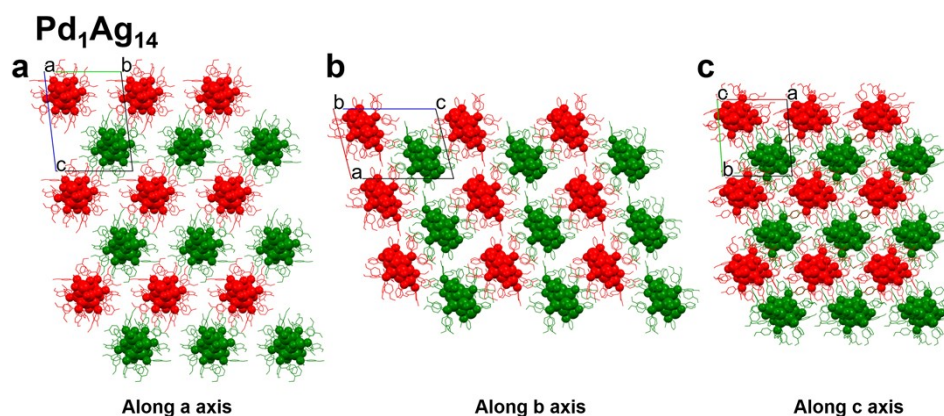

**Fig. S7** Packing mode of **Pd<sub>1</sub>Ag<sub>14</sub>** in the crystal shown. (a) Along a axis; (b) along b axis; (c) along c axis. All H atoms are omitted for clarity. The cluster molecules arranged in different directions show in different colors.

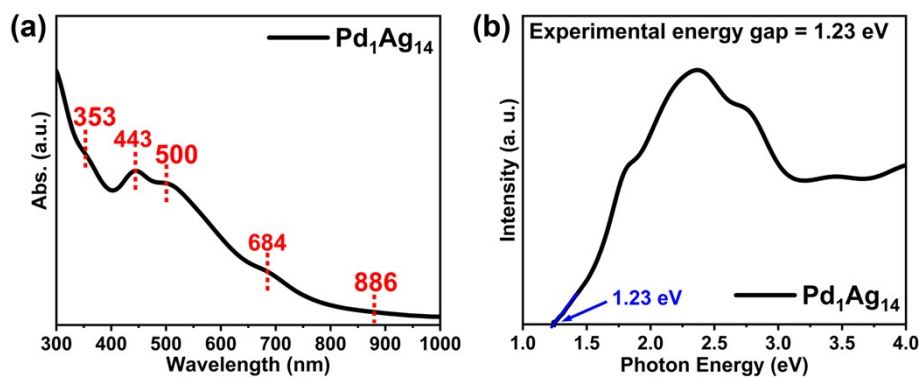

**Fig. S8** Characterization of **Pd<sub>1</sub>Ag<sub>14</sub>** nanocluster. (a) UV-Vis spectrum; (b) UPS.

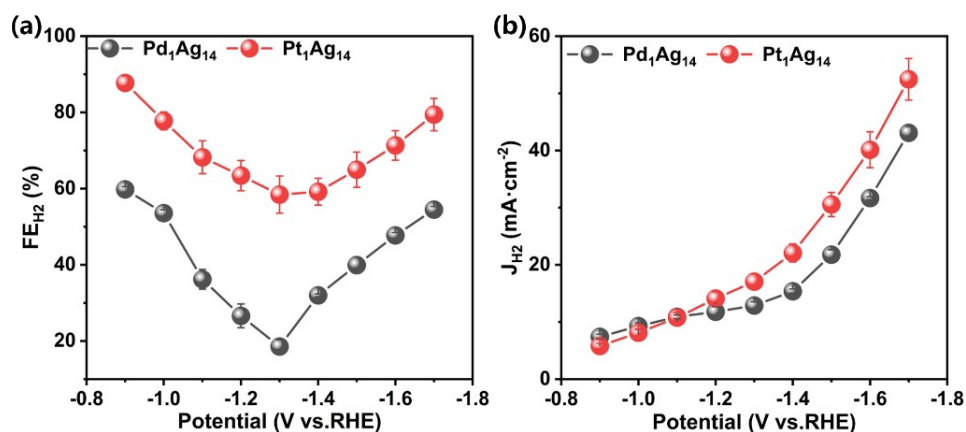

**Fig. S9** (a)  $\text{H}_2$  faradaic efficiency of the  $\text{Pd}_1\text{Ag}_{14}/\text{C}$  (black) and  $\text{Pt}_1\text{Ag}_{14}/\text{C}$  (red) at different potentials. (b)  $\text{H}_2$  partial current density of the  $\text{Pd}_1\text{Ag}_{14}/\text{C}$  (black) and  $\text{Pt}_1\text{Ag}_{14}/\text{C}$  (red) at different potentials.

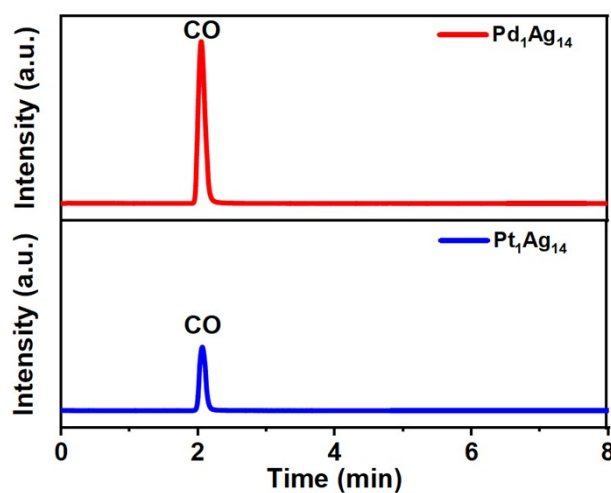

**Fig. S10** Gas products ( $\text{CO}$ ) analysis for  $\text{eCO}_2\text{RR}$  on  $\text{Pd}_1\text{Ag}_{14}/\text{C}$  and  $\text{Pt}_1\text{Ag}_{14}/\text{C}$ . Gas chromatography shows the gas products of  $\text{eCO}_2\text{RR}$  at  $-1.3 \text{ V}_{\text{RHE}}$ .

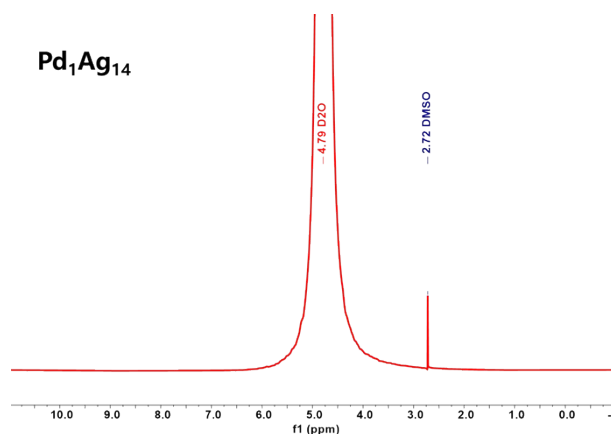

**Fig. S11** The  $^1\text{H}$  NMR spectra of the catholyte reaction solution for the  $\text{Pd}_1\text{Ag}_{14}/\text{C}$ .

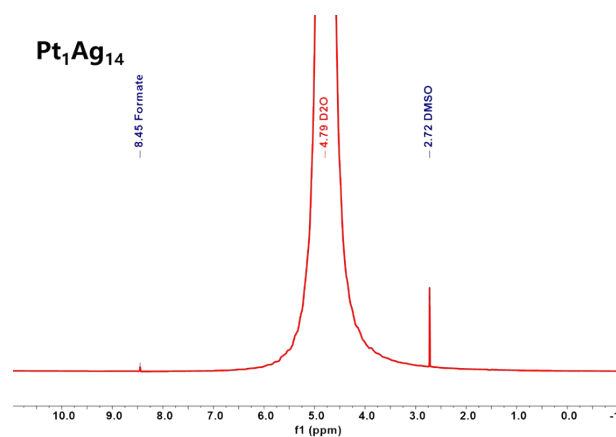

**Fig. S12** The  $^1\text{H}$  NMR spectra of the catholyte reaction solution for the  $\text{Pt}_1\text{Ag}_{14}/\text{C}$ .

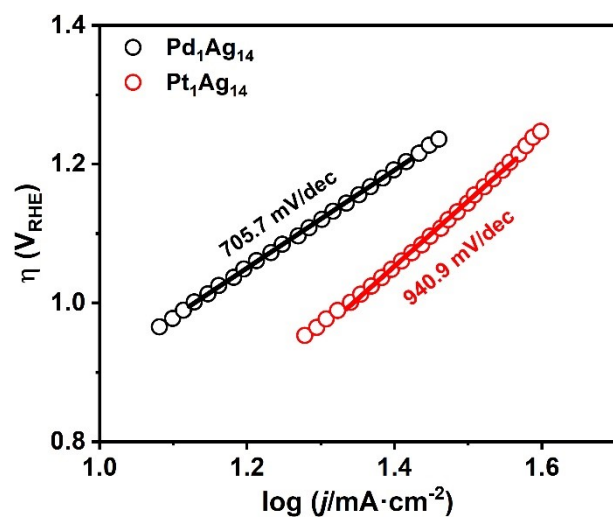

**Fig. S13** Tafel plots constructed for the  $\text{eCO}_2\text{RR}$  on the two catalysts.

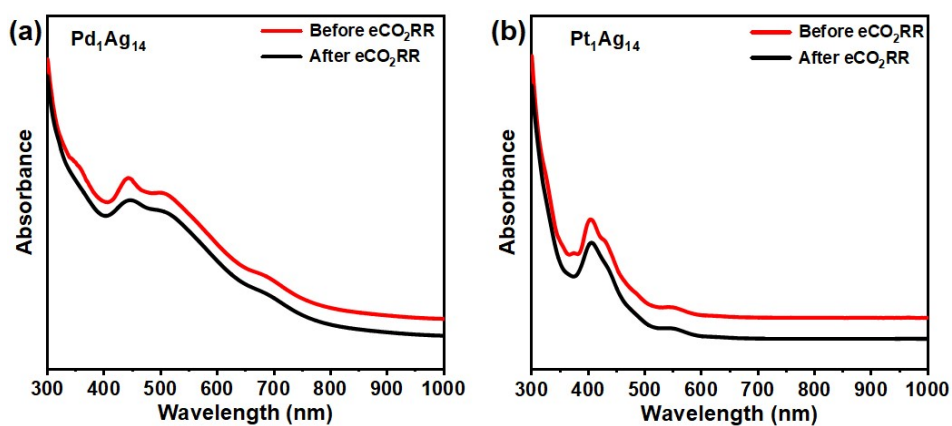

**Fig. S14** UV-vis absorbance spectra of the three nanoclusters before and after  $\text{eCO}_2\text{RR}$ . (a)  $\text{Pd}_1\text{Ag}_{14}$  and (b)  $\text{Pt}_1\text{Ag}_{14}$ .

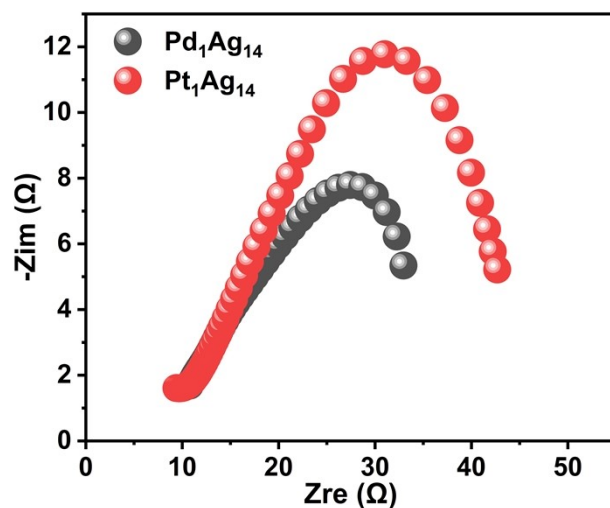

**Fig. S15** The Electrochemical Impedance Spectroscopy of  $\text{Pd}_1\text{Ag}_{14}/\text{C}$  and  $\text{Pt}_1\text{Ag}_{14}/\text{C}$ .

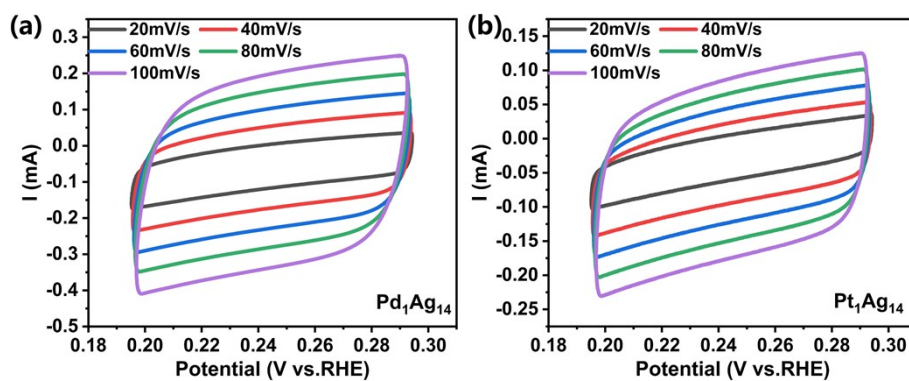

**Fig. S16** CV curves at various scan rates (from 20 to 100  $\text{mV s}^{-1}$ ) of (a)  $\text{Pd}_1\text{Ag}_{14}/\text{C}$  and (b)  $\text{Pt}_1\text{Ag}_{14}/\text{C}$ .

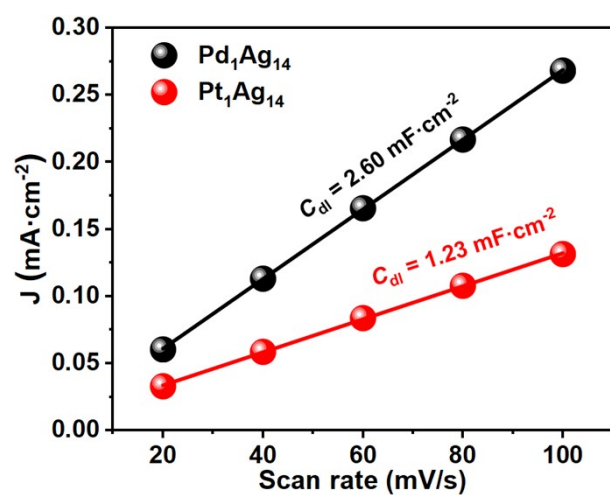

**Fig. S17** The comparison of electrochemical double layer capacitance over  $\text{Pd}_1\text{Ag}_{14}/\text{C}$  (black line) and  $\text{Pt}_1\text{Ag}_{14}/\text{C}$  (red line).

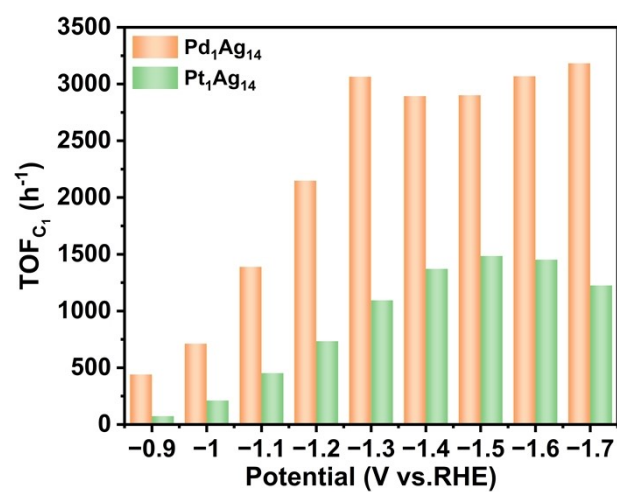

**Fig. S18** The turnover frequency of C<sub>1</sub> products was obtained from **Pd<sub>1</sub>Ag<sub>14</sub>/C** and **Pt<sub>1</sub>Ag<sub>14</sub>/C**.

## Section 2. Supporting Tables

**Table S1.** The crystal structure parameters for **Pt<sub>1</sub>Ag<sub>14</sub>** nanocluster.

|                                             |                                                                                                    |
|---------------------------------------------|----------------------------------------------------------------------------------------------------|
| Empirical formula                           | C <sub>183</sub> H <sub>177</sub> Ag <sub>14</sub> O <sub>21</sub> P <sub>7</sub> PtS <sub>6</sub> |
| Formula weight                              | 4826.66                                                                                            |
| Temperature/K                               | 120                                                                                                |
| Crystal system                              | triclinic                                                                                          |
| Space group                                 | <i>P</i> -1                                                                                        |
| a/Å                                         | 19.411                                                                                             |
| b/Å                                         | 20.798                                                                                             |
| c/Å                                         | 27.800                                                                                             |
| $\alpha$ /°                                 | 81.778                                                                                             |
| $\beta$ /°                                  | 75.137                                                                                             |
| $\gamma$ /°                                 | 83.738                                                                                             |
| Volume/Å <sup>3</sup>                       | 10706                                                                                              |
| Z                                           | 2                                                                                                  |
| $\rho_{\text{calc}}$ /cm <sup>3</sup>       | 1.497                                                                                              |
| $\mu$ /mm <sup>-1</sup>                     | 2.062                                                                                              |
| F(000)                                      | 4760.0                                                                                             |
| Crystal size/mm <sup>3</sup>                | 0.113 × 0.091 × 0.086                                                                              |
| Radiation                                   | Mo K $\alpha$ ( $\lambda$ = 0.71073)                                                               |
| 2 $\Theta$ range for data collection/°      | 3.968 to 50.852                                                                                    |
| Reflections collected                       | 38476                                                                                              |
| Independent reflections                     | 36476 [ $R_{\text{int}}$ = 0.172, $R_{\text{sigma}}$ = 0.3432]                                     |
| Data/restraints/parameters                  | 36476/2932/1786                                                                                    |
| Goodness-of-fit on F <sup>2</sup>           | 0.862                                                                                              |
| Final R indexes [ $I \geq 2\sigma(I)$ ]     | $R_1$ = 0.0966, $wR_2$ = 0.2076                                                                    |
| Final R indexes [all data]                  | $R_1$ = 0.2266, $wR_2$ = 0.2467                                                                    |
| Largest diff. peak/hole / e Å <sup>-3</sup> | 2.01/-1.75                                                                                         |

**Table S2.** The data of Bader charge analysis for the **Pd<sub>1</sub>Ag<sub>14</sub>** nanocluster.

| Atom labels | X        | Y        | Z        | Charge   | Min dist | Atomic vol |
|-------------|----------|----------|----------|----------|----------|------------|
| Pd1         | 15.00522 | 14.55735 | 14.81242 | 10.2563  | 1.25858  | 16.47431   |
| Ag1         | 15.85143 | 13.30881 | 12.46315 | 10.90304 | 1.10907  | 23.7125    |
| Ag2         | 15.8037  | 17.22564 | 15.15252 | 10.94374 | 1.11189  | 25.67444   |
| Ag3         | 16.99509 | 12.58974 | 15.08084 | 10.94768 | 1.1277   | 25.81931   |
| Ag4         | 14.17812 | 11.88546 | 14.47345 | 10.94708 | 1.12371  | 25.72403   |
| Ag5-exposed | 15.63585 | 14.66397 | 19.43827 | 10.73495 | 1.11374  | 40.42889   |
| Ag6         | 13.09641 | 14.10876 | 12.82603 | 10.90697 | 1.08516  | 23.76403   |
| Ag7         | 17.60724 | 15.20712 | 13.92528 | 10.93853 | 1.11294  | 25.77653   |
| Ag8         | 14.11554 | 15.81204 | 17.14969 | 10.9014  | 1.11588  | 23.85542   |
| Ag9         | 15.1527  | 16.11552 | 12.50382 | 10.90596 | 1.0802   | 23.8875    |
| Ag10        | 12.41901 | 13.8924  | 15.68823 | 10.9395  | 1.09559  | 25.39639   |
| Ag11        | 13.02603 | 16.55244 | 14.53949 | 10.94025 | 1.11494  | 25.83097   |
| Ag12        | 16.93335 | 15.03114 | 16.77694 | 10.90621 | 1.09207  | 23.66681   |
| Ag13        | 14.86863 | 12.9615  | 17.10776 | 10.90016 | 1.10375  | 23.66292   |
| Ag14        | 14.31843 | 14.46171 | 9.64894  | 10.75393 | 1.15533  | 22.38931   |



**Table S3.** The data of Bader charge analysis for the **Pt<sub>1</sub>Ag<sub>14</sub>** nanocluster.

| Atom labels  | X        | Y        | Z        | Charge   | Min dist | Atomic vol |
|--------------|----------|----------|----------|----------|----------|------------|
| Pt1          | 14.47944 | 14.16897 | 14.83601 | 10.51758 | 1.28697  | 18.58694   |
| Ag1          | 14.31372 | 13.78587 | 9.68065  | 10.71844 | 1.14555  | 22.33875   |
| Ag2          | 13.14885 | 12.91476 | 12.71515 | 10.87907 | 1.08131  | 23.41792   |
| Ag3          | 12.4011  | 12.41415 | 15.5274  | 10.92059 | 1.08051  | 25.29236   |
| Ag4          | 11.84778 | 15.02997 | 14.34521 | 10.92461 | 1.09247  | 25.21653   |
| Ag5          | 14.08242 | 15.64476 | 12.48877 | 10.88545 | 1.08549  | 23.47917   |
| Ag6          | 14.98434 | 11.41224 | 14.50817 | 10.93531 | 1.13317  | 25.45958   |
| Ag7          | 15.98352 | 13.46559 | 12.59125 | 10.89175 | 1.10396  | 23.3975    |
| Ag8          | 16.54869 | 15.93915 | 14.13223 | 10.92096 | 1.08579  | 25.47028   |
| Ag9          | 17.09769 | 13.27467 | 15.31436 | 10.92224 | 1.11704  | 25.59667   |
| Ag10         | 15.85494 | 15.4278  | 16.92779 | 10.87515 | 1.09357  | 23.59      |
| Ag11         | 14.84559 | 12.66357 | 17.16631 | 10.87877 | 1.1161   | 23.29736   |
| Ag12         | 12.95172 | 14.91417 | 17.05837 | 10.88674 | 1.09344  | 23.50444   |
| Ag13-exposed | 14.64354 | 14.51889 | 19.4901  | 10.70281 | 1.10356  | 39.79306   |
| Ag14         | 13.97097 | 16.91667 | 15.13859 | 10.93361 | 1.11706  | 25.41097   |
